# Supplementary material
Source: Springer Nature journal article supplement (https://www.springermedizin.de/resource/supplementary/12985_2009_800_MOESM2_ESM.pdf/9609218)
Supplement: MOESM2 [file 9609218]

*in silico* prediction*in vitro* phenotyping

| Sample/<br>HIV-1 strain | Web PSSM                             | Geno2<br>pheno | IsnoR5<br>Cells | PBMCs | TZMBL<br>Cells<br><small>(LacZ positive cells)</small> | TZMBL<br>Cells + R5i<br><small>(LacZ positive cells)</small> | Results<br>phenotyping |
|-------------------------|--------------------------------------|----------------|-----------------|-------|--------------------------------------------------------|--------------------------------------------------------------|------------------------|
| d(-61)                  | X4<br><small>(-4.47 - -2.84)</small> | X4             | -               | +     | 272                                                    | 1                                                            | R5                     |
| d(-8)                   | R5<br><small>(-7.94)</small>         | X4             | -               | -     | 0                                                      | 0                                                            | -                      |
| d 20                    | X4<br><small>(-4.19)</small>         | X4             | -               | +     | 25608                                                  | 1                                                            | R5                     |
| d 35                    | X4<br><small>(-4.19)</small>         | X4             | -               | -     | 1                                                      | 0                                                            | -                      |
| d 42                    | X4<br><small>(-4.19)</small>         | X4             | n.d.            | n.d.  | n.d.                                                   | n.d.                                                         | -                      |
| d 105                   | X4<br><small>(-4.19)</small>         | X4             | -               | -     | 0                                                      | 0                                                            | -                      |
| d 198                   | X4<br><small>(-4.19 - -3.50)</small> | X4             | -               | +     | 24                                                     | 1                                                            | R5                     |
| d 384                   | X4<br><small>(-4.28 - -4.19)</small> | X4             | n.d.            | n.d.  | n.d.                                                   | n.d.                                                         | -                      |
| HIV-1 SF2               | X4                                   | X4             | +               | +     | 66                                                     | 128                                                          | X4                     |
| HIV-1 SF162             | R5                                   | R5             | -               | +     | 36472                                                  | 63                                                           | R5                     |
